# Supplementary material
Source: publisher site journal article supplement (http://www.kjim.org/upload/media/kjim-2022-050-suppl4.pdf)
Supplement: Supplementary file 1 [file kjim-2022-050-suppl4.pdf]

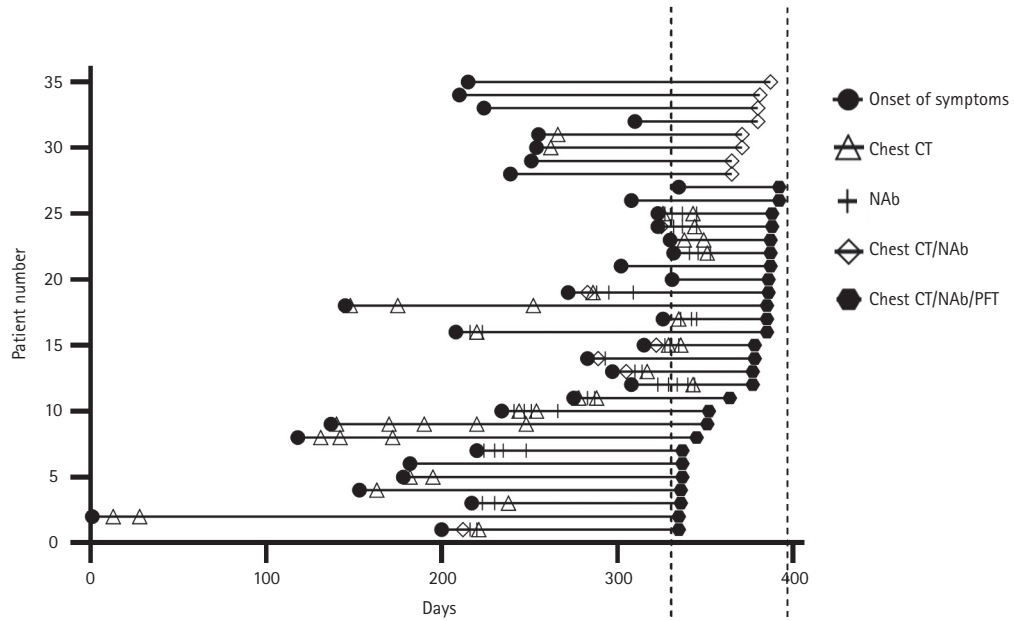

**Supplementary Figure 2.** Timing of chest computed tomography (CT) scan, pulmonary function test (PFT), and neutralizing antibody (NAb) test of 35 patients who had been hospitalized for coronavirus disease 2019 (COVID-19) and visited the follow-up outpatient clinic after recovery from COVID-19. The period between the two vertical dotted lines indicates the study period. The time of symptoms onset was marked with a black circle. The hollow triangle shows the chest CT scan, the small vertical line the NAb test, and the hollow diamond when both tests were performed. The black hexagons indicate that chest CT scan, PFT, and NAb test were performed on the same day.
